# Supplementary material for: A Novel Peptide with Antifungal Activity from Red Swamp Crayfish Procambarus clarkii
Source: MDPI journal article supplement (doi:10.3390/antibiotics11121792), 2022-12-10

## Supplementary Material File S1:

LC-MS/MS data were analyzed by the PEAKS software package, that incorporates the de novo sequencing results into the database search.

Database search didn't match any peptide derived from *Crustacea* proteins. However, from the MS/MS spectra, de novo sequencing derived the amino acid sequence of fourteen peptides that remained unidentified by the database search algorithm. In detail, ten peptides were identified in polypeptide-enriched extract from haemocytes and four in polypeptide-enriched extract from haemolymph. Taking into account the characteristics of these peptides, some of them may represent potential AMPs.

### nLC-MS/MS of peptide fraction from haemocytes and haemolymph

List of the fourteen de novo derived sequences remained unidentified by the database search algorithm. Peptides #1-#10 were identified in haemocytes extract; peptides #11-#14 were identified in haemolymph extract.

| N.  | Peptide                         | ALC (%) <sup>a)</sup> | Experimental m/z | z  | Experimental Mass (monoisotopic) | Theoretical Mass (monoisotopic) | Theoretical m/z=(M+2H <sup>+</sup> ) <sup>2+</sup> (monoisotopic) | Error (ppm) <sup>b)</sup> |
|-----|---------------------------------|-----------------------|------------------|----|----------------------------------|---------------------------------|-------------------------------------------------------------------|---------------------------|
| #1  | M(+15.99)FLHGHAV <sup>c)</sup>  | 90                    | 464.2328         | +2 | 926.4510                         | 926.4433                        | 464.5546                                                          | -8.5                      |
| #2  | E(-18.01)GLDDDERL <sup>d)</sup> | 89                    | 522.2357         | +2 | 1042.4568                        | 1042.4567                       | 522.2356                                                          | 0.1                       |
| #3  | SSGYGGYGGGRF                    | 87                    | 582.7574         | +2 | 1163.5002                        | 1163.4496                       | 582.7571                                                          | 0.6                       |
| #4  | LNVAQMLLQ                       | 85                    | 579.3215         | +2 | 1156.6284                        | 1156.6274                       | 579.3210                                                          | 0.9                       |
| #5  | NNWTGADCKAATLK                  | 84                    | 746.8683         | +2 | 1491.7220                        | 1491.7140                       | 746.8643                                                          | 5.3                       |
| #6  | SHGDSALSSTF                     | 82                    | 554.7498         | +2 | 1107.4850                        | 1107.4833                       | 554.7489                                                          | 1.7                       |
| #7  | YGGYFGNR                        | 81                    | 467.2144         | +2 | 932.4142                         | 932.4141                        | 467.2143                                                          | 0.2                       |
| #8  | ETEASLTAALPRW                   | 81                    | 722.8807         | +2 | 1443.7468                        | 1443.7358                       | 722.8752                                                          | 7.7                       |
| #9  | LVDSNGALLDELPVAR                | 80                    | 841.4600         | +2 | 1680.9054                        | 1680.9047                       | 841.4596                                                          | 0.5                       |
| #10 | KLLDNSAEDLEELASHK               | 80                    | 1013.0297        | +2 | 2024.0448                        | 2024.0426                       | 1013.0286                                                         | 1.1                       |
| #11 | AADSFGETFAATL                   | 92                    | 650.8069         | +2 | 1299.5992                        | 1299.5983                       | 650.8064                                                          | 0.8                       |
| #12 | FDTLSSHLVATD                    | 91                    | 653.3208         | +2 | 1304.6270                        | 1304.6249                       | 653.3197                                                          | 1.8                       |
| #13 | ETAPLSGVCF                      | 84                    | 512.2412         | +2 | 1022.4678                        | 1022.4743                       | 512.2444                                                          | -6.2                      |
| #14 | FSLVNAVDAQTT                    | 80                    | 597.8040         | +2 | 1193.5934                        | 1193.5928                       | 597.8037                                                          | 0.6                       |

- PEAKS assigns a local confidence score for each amino acid in a de novo sequence. The local confidence score ranges from 0% to 99%, indicating how confident the algorithm considers a particular amino acid as the correct assignment. Moreover, the peptide sequence is evaluated by an ALC (Average of Local Confidence) score. ALC is the average of the local confidence score of all the amino acids in the sequence.
- Error (in ppm) is calculated by the software, comparing the experimental m/z and the theoretical m/z (doubly-charged ion) derived from the amino acid deduced sequence.
- The N-terminal methionine was in oxidized form.

d) The N-terminal glutamic acid residue was in the pyroglutamic acid form.

De novo interpretation of MS/MS Spectra

Peptide # 1

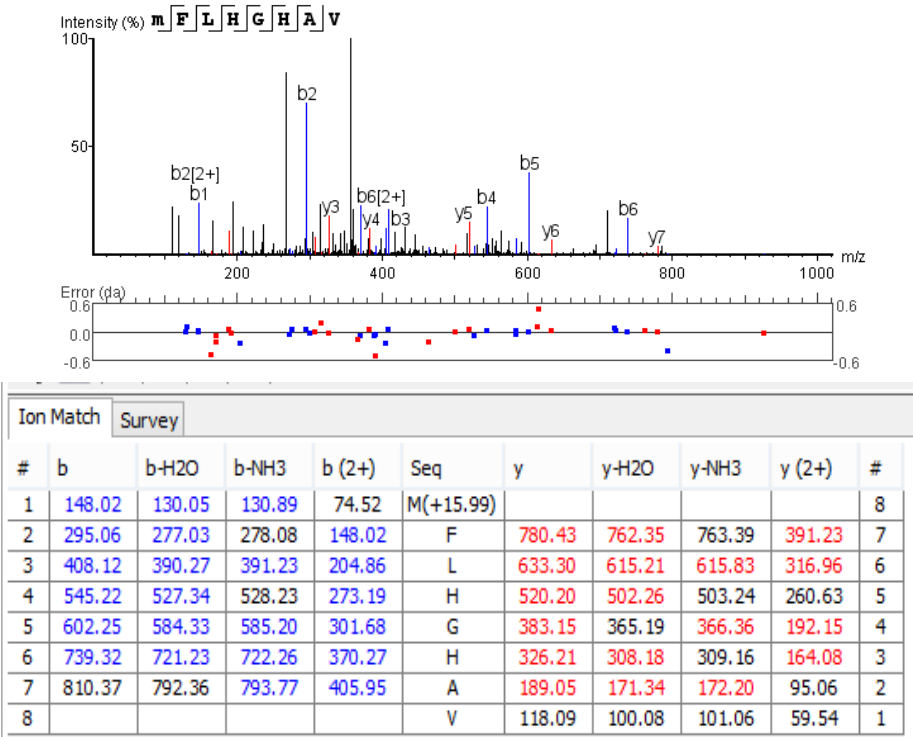

Peptide # 2

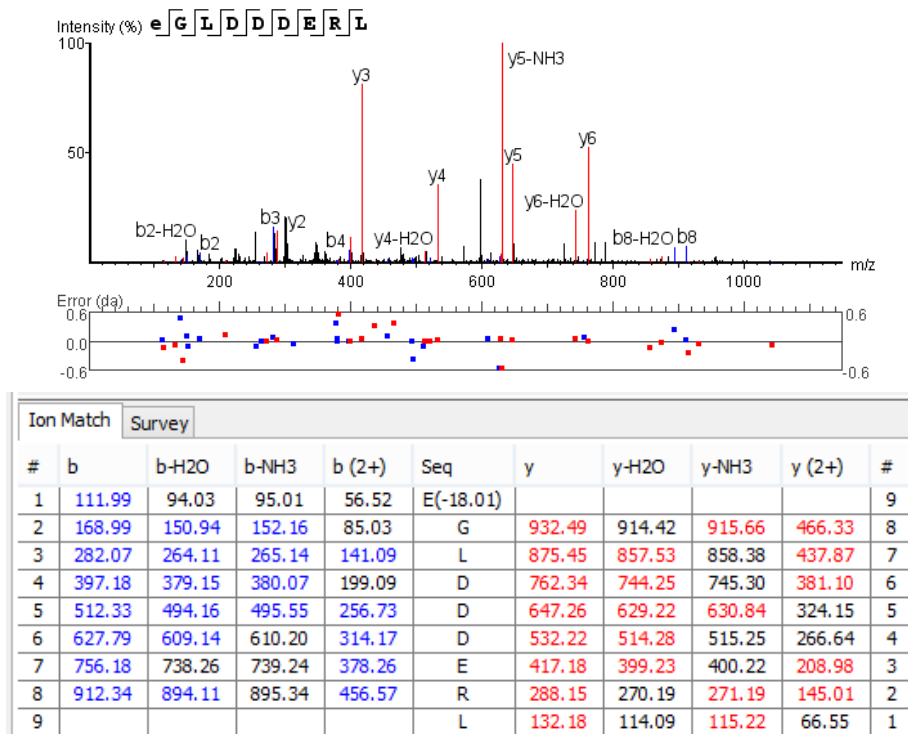

## Peptide # 3

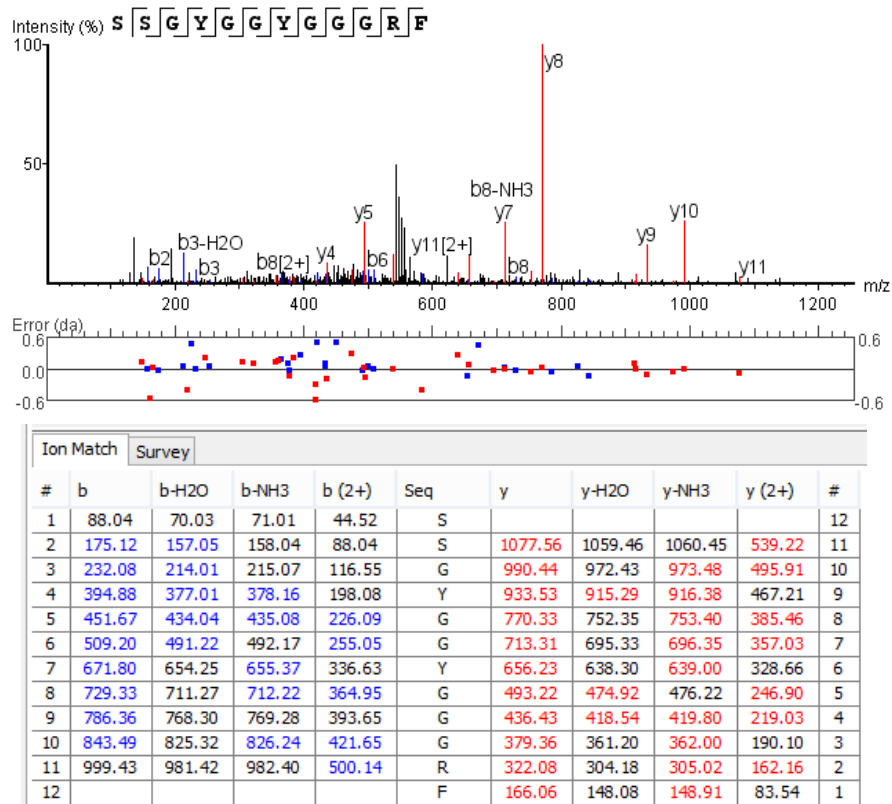

## Peptide # 4

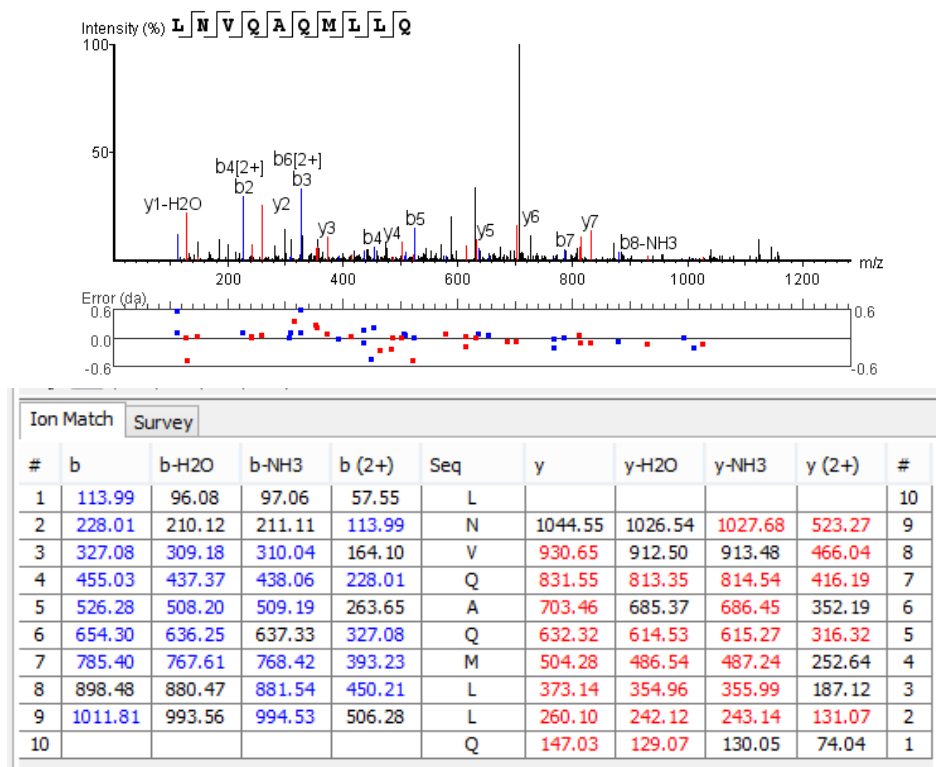

## Peptide # 5

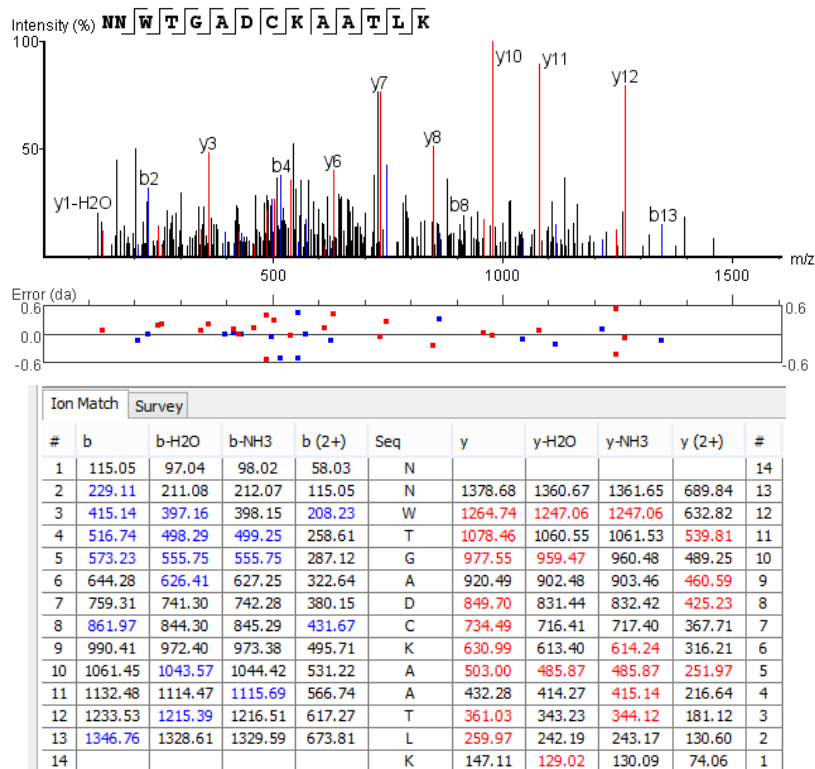

## Peptide # 6

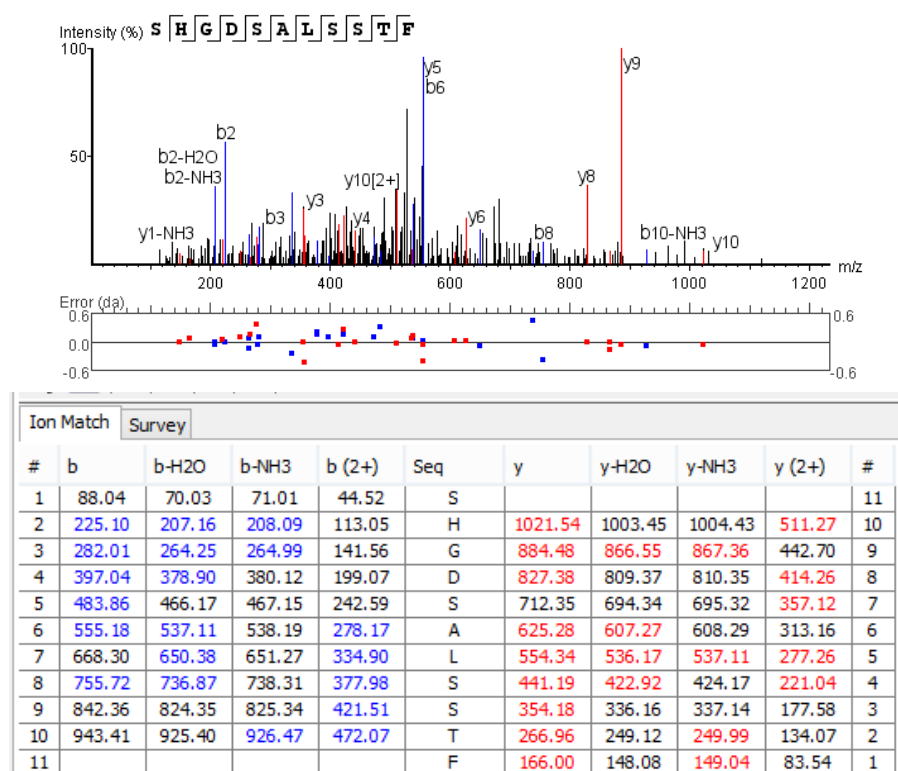

## Peptide # 7

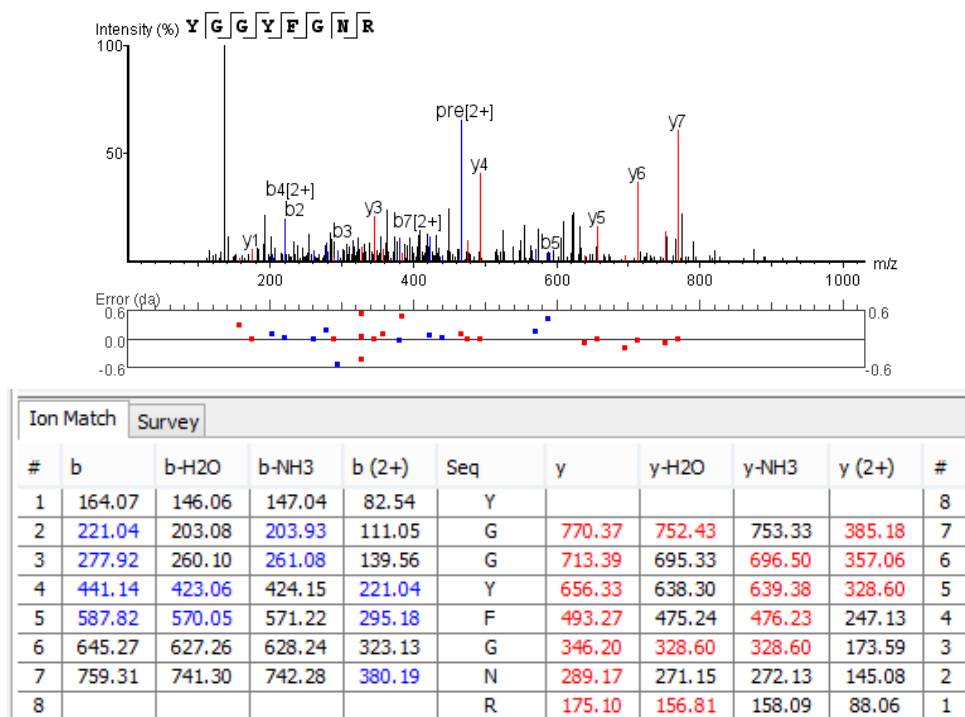

## Peptide # 8

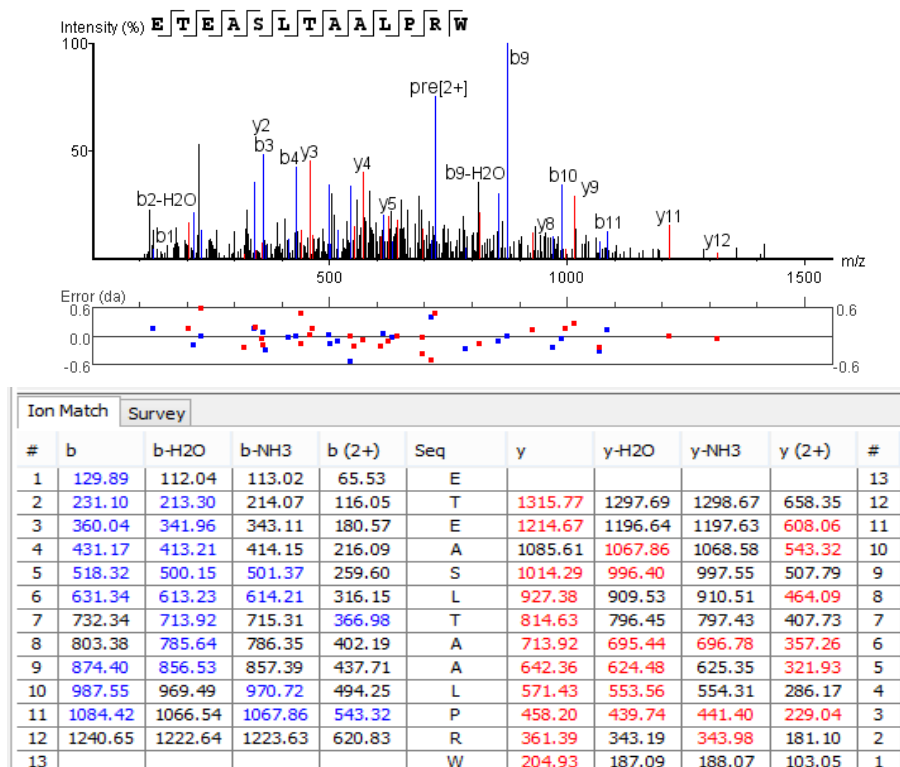

## Peptide # 9

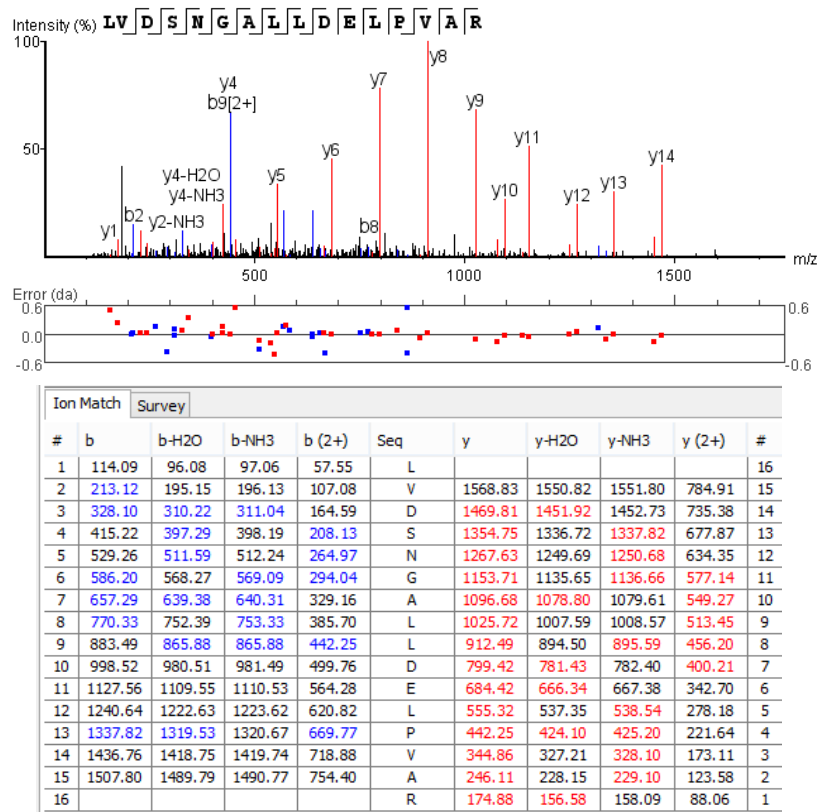

## Peptide # 10

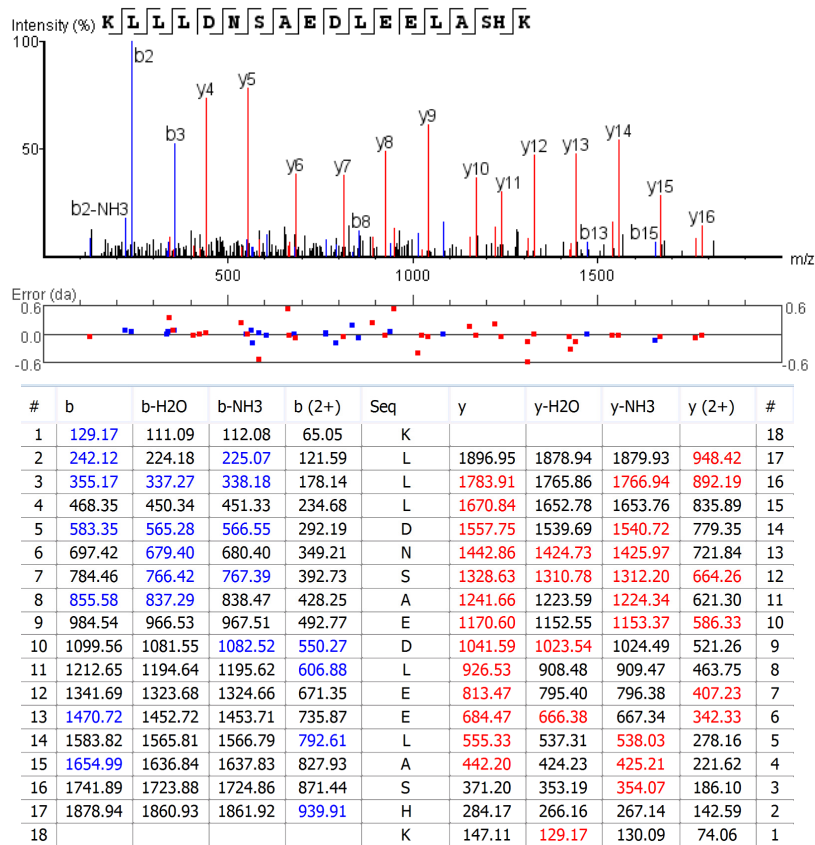

## Peptide # 11

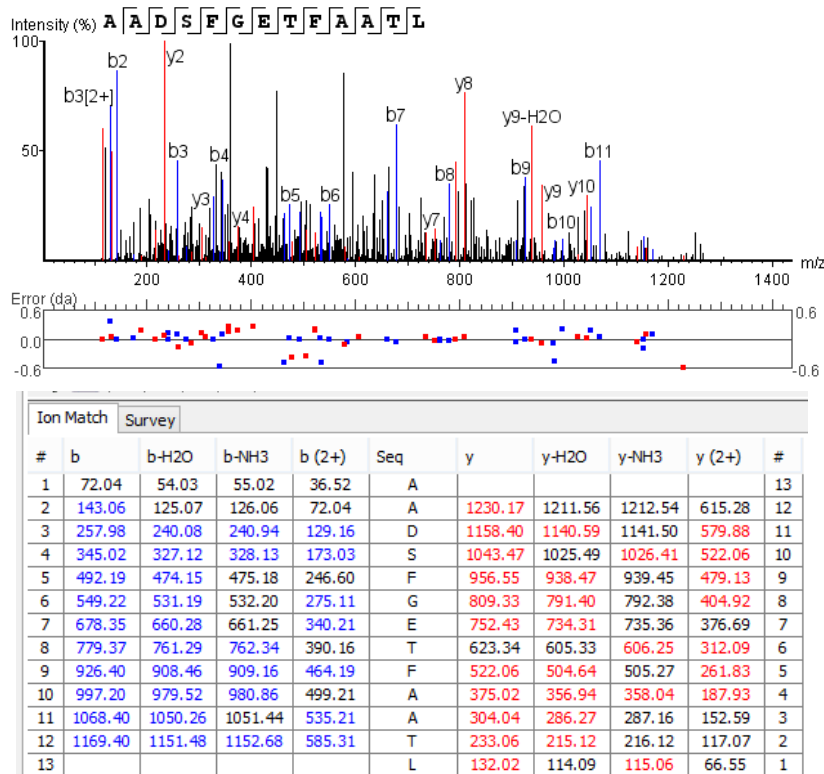

## Peptide # 12

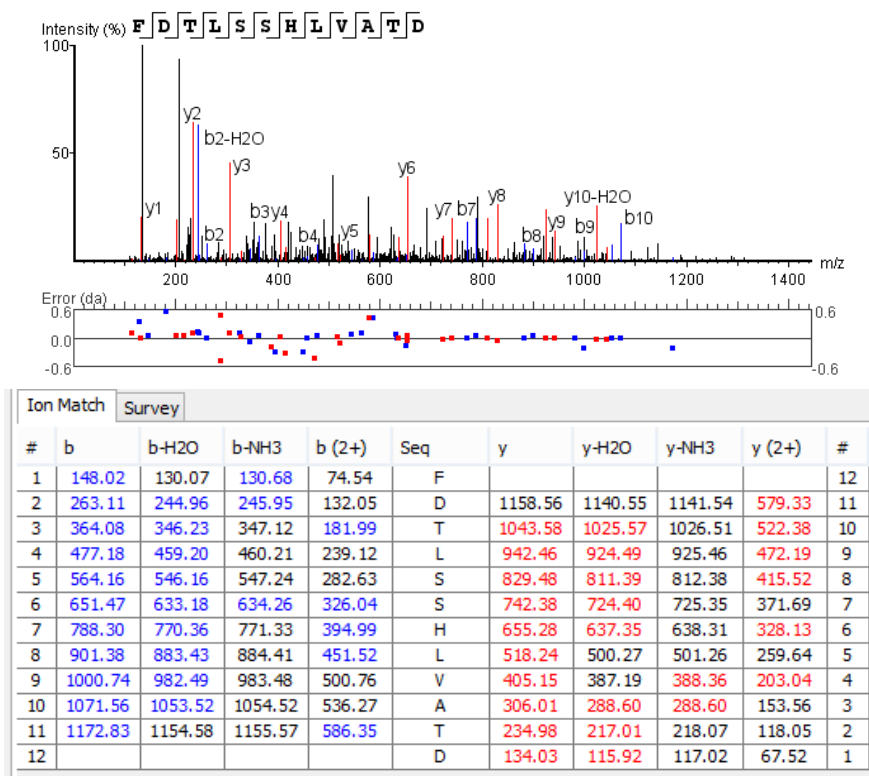

## Peptide # 13

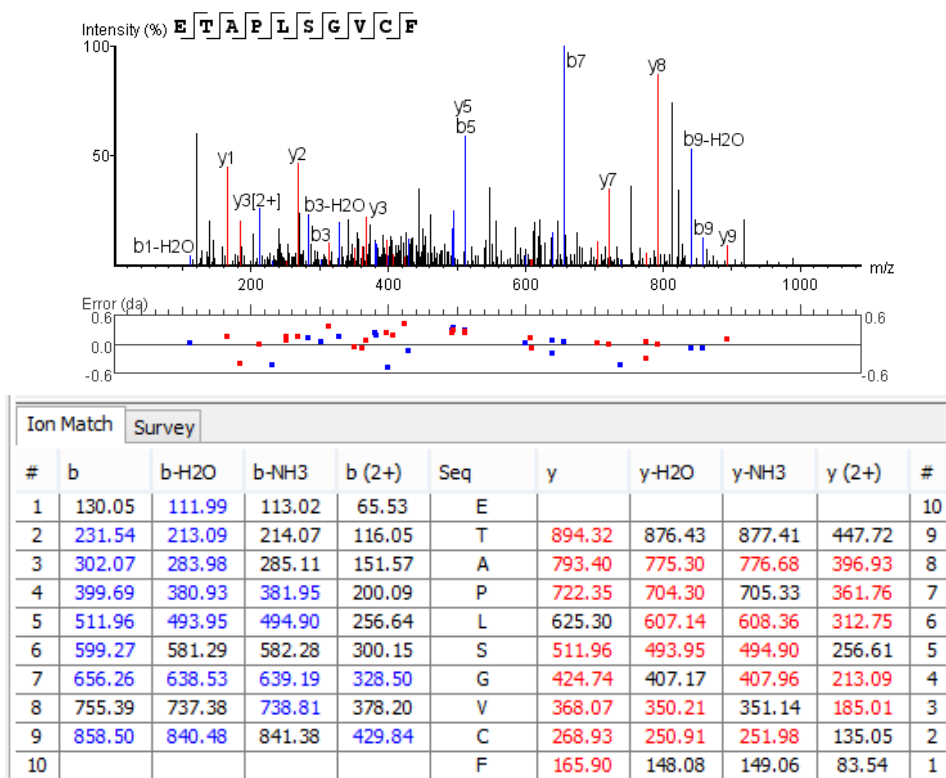



Peptide # 14

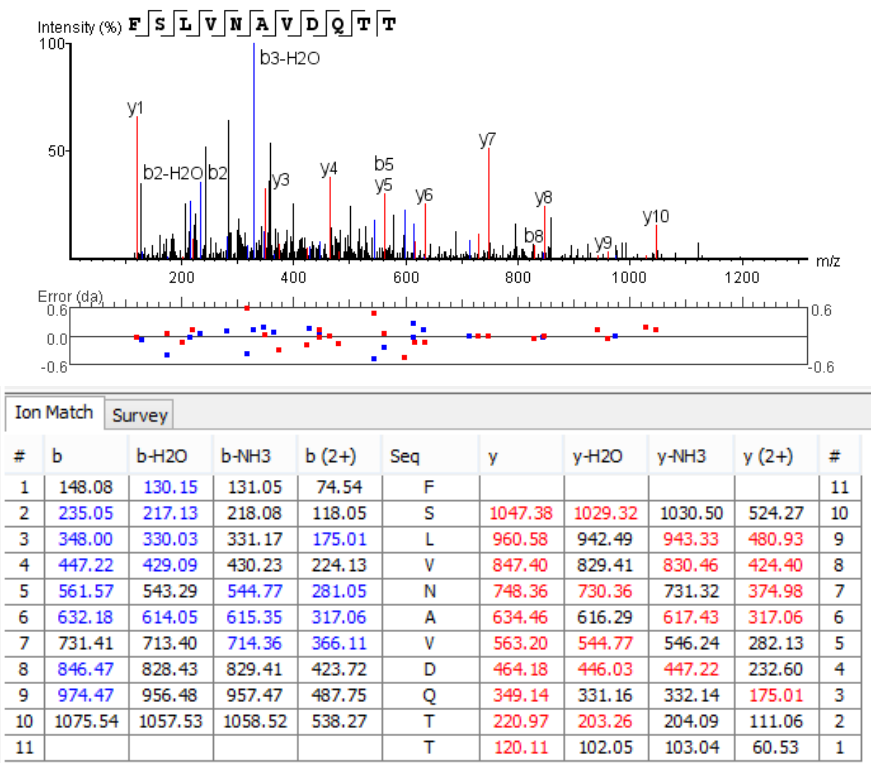

Supplement: s1 [file s1]
